# Supplementary material for: Proximity of public elementary schools to major roads in Canadian urban areas
Source: Springer Nature journal article supplement (doi:10.1186/1476-072x-10-68), 2011-12-01
Supplement: Additional file 1 [file 1476-072x-10-68-s1.pdf]

## **Additional file 1. Data sources for school locations and characteristics.**

---

| <b>City</b> | <b>Link</b>                                                                                                                                                             |
|-------------|-------------------------------------------------------------------------------------------------------------------------------------------------------------------------|
| Calgary     | <a href="http://education.alberta.ca/apps/schoolsdir/">http://education.alberta.ca/apps/schoolsdir/</a>                                                                 |
| Edmonton    | <a href="http://education.alberta.ca/apps/schoolsdir/">http://education.alberta.ca/apps/schoolsdir/</a>                                                                 |
| Hamilton    | <a href="http://www.edu.gov.on.ca/eng/sift/index.asp">http://www.edu.gov.on.ca/eng/sift/index.asp</a>                                                                   |
| Mississauga | <a href="http://www.edu.gov.on.ca/eng/sift/index.asp">http://www.edu.gov.on.ca/eng/sift/index.asp</a>                                                                   |
| Montreal    | <a href="http://www.mels.gouv.qc.ca/sections/publications/index.asp?page=statistiques">http://www.mels.gouv.qc.ca/sections/publications/index.asp?page=statistiques</a> |
| Ottawa      | <a href="http://www.edu.gov.on.ca/eng/sift/index.asp">http://www.edu.gov.on.ca/eng/sift/index.asp</a>                                                                   |
| Quebec      | <a href="http://www.mels.gouv.qc.ca/sections/publications/index.asp?page=statistiques">http://www.mels.gouv.qc.ca/sections/publications/index.asp?page=statistiques</a> |
| Toronto     | <a href="http://www.edu.gov.on.ca/eng/sift/index.asp">http://www.edu.gov.on.ca/eng/sift/index.asp</a>                                                                   |
| Vancouver   | <a href="http://www.bced.gov.bc.ca/apps/imcl/imclWeb/Home.do">http://www.bced.gov.bc.ca/apps/imcl/imclWeb/Home.do</a>                                                   |
| Winnipeg    | <a href="http://www.edu.gov.mb.ca/k12/schools">http://www.edu.gov.mb.ca/k12/schools</a>                                                                                 |

---
